# Supplementary material for: Extensive Gains and Losses of Olfactory Receptor Genes in Mammalian Evolution
Source: PubMed Central journal article supplement (PMC1933591; doi:10.1371/journal.pone.0000708), 2007-08-08
Supplement: pone.0000708.s002.pdf [file pone.0000708.s002.pdf]

**Table S1.** Estimated numbers of genes in the ancestral species and those of gene gains and losses for the Euarchontoglires tree and various bootstrap condensed trees

| Node/branch | Bootstrap value (%) |             |             |             |             |
|-------------|---------------------|-------------|-------------|-------------|-------------|
|             | 50                  | 60          | 70          | 80          | 90          |
| A           | 185                 | 167         | 152         | 132         | 118         |
| a1          | +153 / -73          | +158 / -60  | +161 / -48  | +165 / -32  | +169 / -22  |
| a2          | +388 / -12          | +362 / -9   | +347 / -7   | +340 / -6   | +319 / -4   |
| B           | 561                 | 520         | 492         | 466         | 433         |
| b1          | +737 / -110         | +751 / -83  | +759 / -63  | +775 / -53  | +797 / -42  |
| b2          | +474 / -64          | +417 / -53  | +353 / -45  | +300 / -34  | +241 / -25  |
| C           | 971                 | 884         | 800         | 732         | 649         |
| c1          | +37 / -208          | +32 / -160  | +33 / -116  | +31 / -92   | +25 / -55   |
| c2          | +6 / -189           | +6 / -154   | +6 / -117   | +6 / -89    | +8 / -69    |
| D           | 788                 | 736         | 689         | 649         | 588         |
| d1          | +463 / -251         | +443 / -210 | +416 / -172 | +392 / -140 | +367 / -97  |
| d2          | +40 / -384          | +37 / -334  | +36 / -290  | +33 / -257  | +29 / -202  |
| E           | 800                 | 756         | 717         | 671         | 619         |
| e1          | +412 / -242         | +423 / -209 | +434 / -181 | +446 / -147 | +470 / -119 |
| e2          | +262 / -251         | +270 / -215 | +280 / -186 | +296 / -156 | +320 / -128 |
| F           | 1,000               | 969         | 933         | 901         | 858         |
| f1          | +174 / -139         | +187 / -121 | +207 / -105 | +226 / -92  | +249 / -72  |
| f2          | +327 / -120         | +347 / -109 | +370 / -96  | +394 / -88  | +429 / -80  |
| G           | 444                 | 439         | 435         | 425         | 415         |
| g1          | +14 / -149          | +17 / -147  | +19 / -145  | +22 / -138  | +26 / -132  |
| g2          | +42 / -99           | +44 / -96   | +47 / -95   | +54 / -92   | +62 / -90   |

For the names of nodes and branches, see Figure S4A. The estimated numbers of gene gains and losses for each branch are shown with plus and minus signs, respectively.
