# Supplementary material for: Extensive Gains and Losses of Olfactory Receptor Genes in Mammalian Evolution
Source: PubMed Central journal article supplement (PMC1933591; doi:10.1371/journal.pone.0000708), 2007-08-08
Supplement: pone.0000708.s003.pdf [file pone.0000708.s003.pdf]

**Table S2.** Estimated numbers of genes in the ancestral species and those of gene gains and losses for the mouse-outside tree and various bootstrap condensed trees

| Node/branch | Bootstrap value (%) |             |             |             |             |
|-------------|---------------------|-------------|-------------|-------------|-------------|
|             | 50                  | 60          | 70          | 80          | 90          |
| B           | 561                 | 520         | 492         | 466         | 433         |
| b1          | +737 / -110         | +751 / -83  | +759 / -63  | +775 / -53  | +797 / -42  |
| b2          | +321 / -64          | +285 / -53  | +250 / -45  | +221 / -34  | +192 / -25  |
| C           | 818                 | 752         | 697         | 653         | 600         |
| c1          | +463 / -281         | +443 / -226 | +416 / -180 | +392 / -144 | +367 / -109 |
| c2          | +78 / -45           | +68 / -31   | +56 / -21   | +42 / -17   | +35 / -11   |
| D           | 851                 | 789         | 732         | 678         | 624         |
| d1          | +37 / -88           | +32 / -65   | +33 / -48   | +31 / -38   | +25 / -30   |
| d2          | +40 / -447          | +37 / -387  | +36 / -333  | +33 / -286  | +29 / -238  |

For the names of nodes and branches, see Figure S4B. The numbers identical to those in Table S1 are omitted.
