# Supplementary material for: Extensive Gains and Losses of Olfactory Receptor Genes in Mammalian Evolution
Source: PubMed Central journal article supplement (PMC1933591; doi:10.1371/journal.pone.0000708), 2007-08-08
Supplement: pone.0000708.s007.pdf [file pone.0000708.s007.pdf]

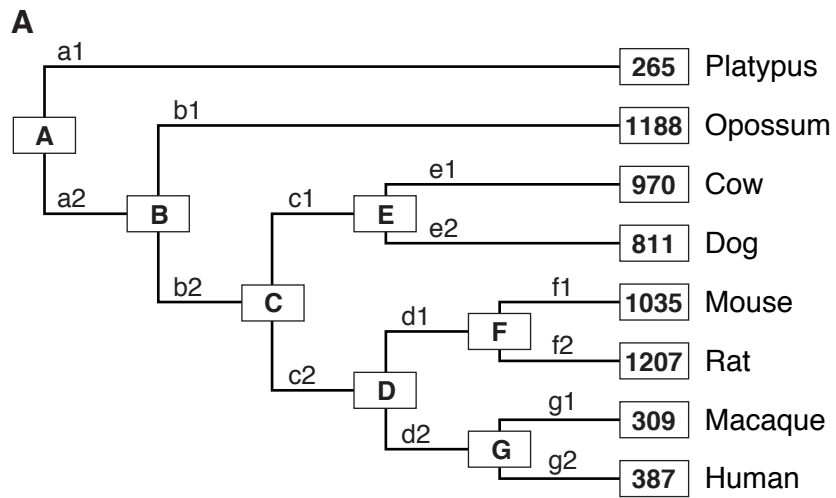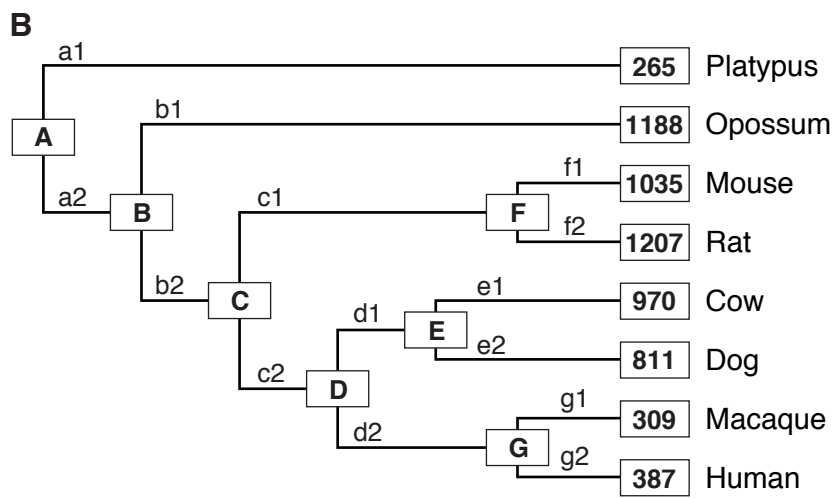

Figure S4
