# Supplementary material for: Extensive Gains and Losses of Olfactory Receptor Genes in Mammalian Evolution
Source: PLOS journal article supplement (doi:10.1371/journal.pone.0000708), 2007-08-07
Supplement: S5 (10.1371/journal.pone.0000708.s005) [file journal.pone.0000708.s005]

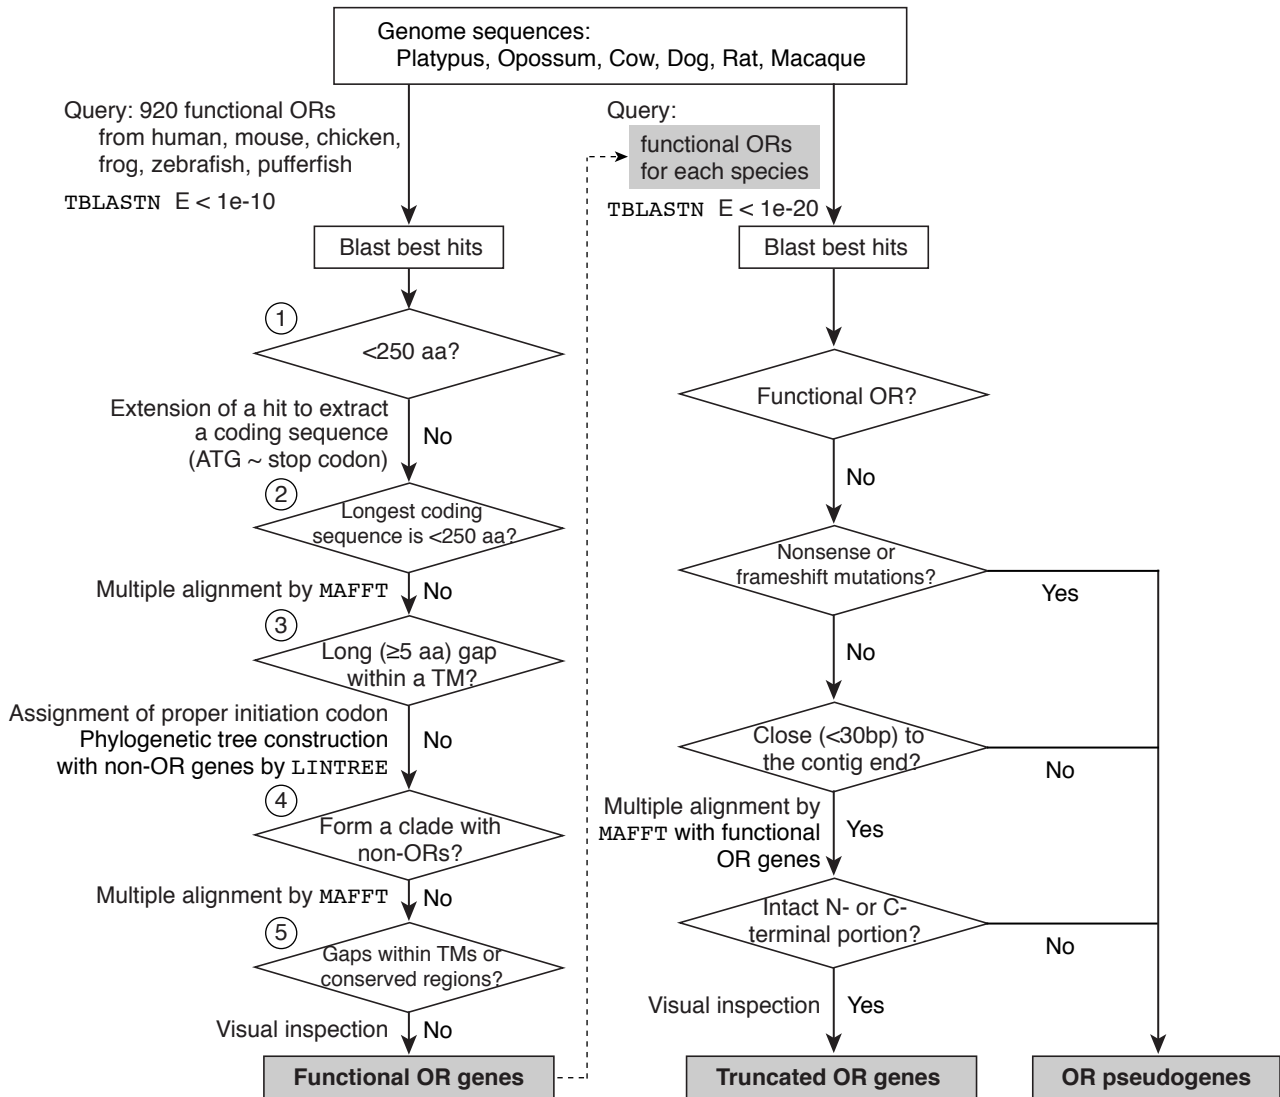

Figure S2
